# Supplementary material
Source: PubMed Central journal article supplement (PMC7169091)
Supplement: RMV-17-67-s001.pdf [file RMV-17-67-s001.pdf]

## Supplementary Material

Supplementary Table. Viruses found to be associated with bats under natural conditions.

| Family        | Genera/species        | Bat genera/species associated with the virus                                                                                                                                                                              | Geographical locations | Method of detection <sup>a</sup> | References |
|---------------|-----------------------|---------------------------------------------------------------------------------------------------------------------------------------------------------------------------------------------------------------------------|------------------------|----------------------------------|------------|
| Arenaviridae  | Tacaribe virus        | <i>Artibeus jamaicensis</i> , <i>Artibeus lituratus</i> , <i>Desmodus rotundus</i> , <i>Phyllostomus hastatus</i> , <i>Sturnira lilium</i> , <i>Tonatia bidens</i> , <i>Uroderma bilobatum</i> , <i>Vampyrops helleri</i> | Trinidad               | Serology                         | 22, 23     |
|               | Bimiti virus          | <i>Anoura geoffroyi</i> , <i>Carollia perspicillata</i> , <i>Natalus tumidirostris</i> , <i>Phyllostomus hastatus</i> , <i>Pteronotus parnellii</i>                                                                       | Trinidad               | Serology                         | 23         |
| Bunyaviridae  | Catu virus            | <i>Anoura geoffroyi</i> , <i>Carollia perspicillata</i> , <i>Phyllostomus hastatus</i>                                                                                                                                    | Trinidad               | Serology                         | 23         |
|               | Guama virus           | <i>Anoura geoffroyi</i> , <i>Artibeus lituratus</i> , <i>Phyllostomus hastatus</i>                                                                                                                                        | Trinidad               | Serology                         | 23         |
|               | Kaeng Khoi virus      | <i>Chaerephon plicata</i> , <i>Taphozous theobaldi</i>                                                                                                                                                                    | Thailand               | Culture, serology                | 24         |
|               | Manzanilla virus      | <i>Chaerephon plicata</i>                                                                                                                                                                                                 | Cambodia               | Culture                          | 25         |
|               | Mojú dos Campos virus | <i>Molossus ater</i>                                                                                                                                                                                                      | Trinidad               | Serology                         | 23         |
|               | Nepuyo virus          | Unknown                                                                                                                                                                                                                   | Brazil                 | Culture                          | 158        |
|               |                       | <i>Artibeus jamaicensis</i> , <i>Phyllostomus hastatus</i>                                                                                                                                                                | Trinidad               | Serology                         | 23         |
|               |                       | <i>Artibeus lituratus</i>                                                                                                                                                                                                 | Trinidad               | Serology                         | 23         |
|               |                       | <i>Pipistrellus kuhli</i>                                                                                                                                                                                                 | Italy                  | Culture                          | 27         |
|               |                       | <i>Rhinolophus sinicus</i> (R. rouxii)                                                                                                                                                                                    | Hong Kong              | RT-PCR                           | 39         |
| Coronaviridae | Bat-SARS-CoV          | <i>Miniopterus magnater</i> , <i>Miniopterus pusillus</i> , <i>Miniopterus schreibersii</i>                                                                                                                               | Hong Kong              | RT-PCR                           | 40         |
|               | Bat-CoV               | <i>Rhinolophus sinicus</i> (R. rouxii)                                                                                                                                                                                    | Hong Kong              | RT-PCR                           | 41         |
|               | Bat-CoV-HKU2          | <i>Rhinolophus sinicus</i> (R. rouxii)                                                                                                                                                                                    | Hong Kong              | RT-PCR                           | 41         |

(Continues)

Supplementary Table (Continued)

| Family       | Genera/species                              | Bat genera/species associated with the virus                                                                                                                                                                                                                                                                                                                                                                                               | Geographical locations                            | Method of detection <sup>a</sup>           | References           |
|--------------|---------------------------------------------|--------------------------------------------------------------------------------------------------------------------------------------------------------------------------------------------------------------------------------------------------------------------------------------------------------------------------------------------------------------------------------------------------------------------------------------------|---------------------------------------------------|--------------------------------------------|----------------------|
|              | Bat-CoV-HKU4                                | <i>Tylonycteris pachypus</i>                                                                                                                                                                                                                                                                                                                                                                                                               | Hong Kong                                         | RT-PCR                                     | 41                   |
|              | Bat-CoV-HKU5                                | <i>Pipistrellus abramus</i>                                                                                                                                                                                                                                                                                                                                                                                                                | Hong Kong                                         | RT-PCR                                     | 41                   |
|              | Bat-CoV-HKU6                                | <i>Myotis ricketti</i>                                                                                                                                                                                                                                                                                                                                                                                                                     | Hong Kong                                         | RT-PCR                                     | 41                   |
|              | Bat-CoV-HKU7                                | <i>Miniopterus magnater</i>                                                                                                                                                                                                                                                                                                                                                                                                                | Hong Kong                                         | RT-PCR                                     | 41                   |
|              | Bat-CoV-HKU8                                | <i>Miniopterus pusillus</i>                                                                                                                                                                                                                                                                                                                                                                                                                | Hong Kong                                         | RT-PCR                                     | 41                   |
|              | SARS-like coronaviruses                     | <i>Rhinolophus ferrumequinum</i> ,<br><i>Rhinolophus macrotis</i> , <i>Rhinolophus pearsoni</i> , <i>Rhinolophus pussilus</i> ,<br><i>Rousettus leschenaulti</i>                                                                                                                                                                                                                                                                           | China                                             | Serology,<br>RT-PCR                        | 42                   |
| Filoviridae  | Ebola virus                                 | <i>Hypsignathus monstrosus</i> , <i>Epomops franqueti</i> , <i>Myonycteris torquata</i>                                                                                                                                                                                                                                                                                                                                                    | Gabon,<br>Republic of<br>the Congo                | Serology,<br>RT-PCR                        | 46                   |
| Flaviviridae | Dengue virus                                | <i>Artibeus</i> spp., <i>Molossus</i> spp.,<br><i>Uroderma</i> spp.<br><i>Rousettus leschenaulti</i>                                                                                                                                                                                                                                                                                                                                       | Costa Rica,<br>Ecuador<br>Hainan<br>Island, China | Serology<br>RT-PCR                         | 56<br>57             |
|              | Ilheus virus                                | <i>Anoura geoffroyi</i> , <i>Phyllostomus hastatus</i> , <i>Pteronotus davyi</i>                                                                                                                                                                                                                                                                                                                                                           | Trinidad                                          | Serology                                   | 23                   |
|              | Japanese encephalitis virus                 | <i>Miniopterus schreibersi fuliginosus</i> , <i>Rhinolophus cornutus cornutus</i>                                                                                                                                                                                                                                                                                                                                                          | Japan                                             | Culture                                    | 55                   |
|              | Kyasanur Forest disease virus               | <i>Hipposideros armiger terasensis</i> ,<br><i>Miniopterus schreibersi fuliginosus</i>                                                                                                                                                                                                                                                                                                                                                     | Taiwan                                            | Culture                                    | 16                   |
|              | Montana <i>Myotis</i> leukocephalitis virus | <i>Cynopterus sphinx</i> , <i>Rhinolophus rouxi</i>                                                                                                                                                                                                                                                                                                                                                                                        | India                                             | Culture                                    | 58, 59               |
|              | Rio Bravo virus                             | <i>Myotis lucifugus</i>                                                                                                                                                                                                                                                                                                                                                                                                                    | Montana,<br>USA                                   | Culture                                    | 60                   |
|              | St. Louis encephalitis virus                | <i>Tadarida brasiliensis</i><br><i>Molossus ater</i><br><i>Eptesicus fuscus</i> , <i>Myotis lucifugus</i><br><i>Anoura geoffroyi</i> , <i>Artibeus jamaicensis</i> ,<br><i>Artibeus lituratus</i> , <i>Carollia perispicillata</i> ,<br><i>Molossus ater</i> , <i>Molossus molossus</i> , <i>Natalus tumidirostris</i> , <i>Phyllostomus hastatus</i> ,<br><i>Pteronotus davyi</i> , <i>Pteronotus parnellii</i> ,<br><i>Sturnira</i> spp. | USA, Mexico<br>Trinidad<br>Ohio, USA<br>Trinidad  | Culture<br>Culture<br>Serology<br>Serology | 62<br>63<br>54<br>23 |

|                     |                                                                                                                                                                                                                                                                                                                                     |                 |                   |        |
|---------------------|-------------------------------------------------------------------------------------------------------------------------------------------------------------------------------------------------------------------------------------------------------------------------------------------------------------------------------------|-----------------|-------------------|--------|
| Tamana bat virus    | <i>Pteronotus parnellii</i>                                                                                                                                                                                                                                                                                                         | Trinidad        | Culture           | 63     |
| West Nile virus     | <i>Rousettus leschenaulti</i>                                                                                                                                                                                                                                                                                                       | India           | Culture           | 47     |
|                     | <i>Eptesicus fuscus</i>                                                                                                                                                                                                                                                                                                             | Wisconsin, USA  | Not mentioned     | 48     |
|                     | <i>Eptesicus fuscus</i> , <i>Myotis lucifugus</i>                                                                                                                                                                                                                                                                                   | USA             | RT-PCR            | 49     |
|                     | <i>Myotis lucifugus</i> , <i>Myotis septentrionalis</i>                                                                                                                                                                                                                                                                             | New Jersey, USA | Serology          | 50     |
| Yellow fever virus  | <i>Artibeus cinereus</i> , <i>Artibeus jamaicensis</i> ,<br><i>Artibeus lituratus</i> , <i>Carollia perspicillata</i> ,<br><i>Glossophaga soricina</i> , <i>Molossus ater</i> ,<br><i>Molossus molossus</i> , <i>Phyllostomus hastatus</i> ,<br><i>Pteronotus davyi</i> , <i>Pteronotus parnellii</i> ,<br><i>Vampyrops helleri</i> | Trinidad        | Serology          | 23     |
| Yokose virus        | <i>Miniopterus fuliginosus</i>                                                                                                                                                                                                                                                                                                      | Japan           | Culture           | 65     |
| Influenza A viruses | <i>Nyctalus noctula</i>                                                                                                                                                                                                                                                                                                             | Kazakhstan      | Culture           | 67     |
|                     | <i>Cynopterus sphinx</i> , <i>Megaderma lyra</i> ,<br><i>Pipistrellus ceylonicus</i> , <i>Rousettus leschenaulti</i>                                                                                                                                                                                                                | India           | Serology          | 68     |
| Hendra virus        | <i>Pteropus alecto</i> , <i>P. conspicillatus</i> ,<br><i>P. poliocephalus</i> , <i>P. scapulatus</i>                                                                                                                                                                                                                               | Australia       | Serology          | 74     |
| Menangle virus      | <i>Pteropus alecto</i> , <i>P. poliocephalus</i>                                                                                                                                                                                                                                                                                    | Australia       | Culture           | 75     |
| Nipah virus         | <i>Pteropus alecto</i> , <i>P. poliocephalus</i>                                                                                                                                                                                                                                                                                    | Australia       | Culture           | 95     |
|                     | <i>Cynopterus brachyotis</i> , <i>Eonycteris spelea</i> , <i>Pteropus hypomelanus</i> ,<br><i>P. vampyrus</i> , <i>Scotophilus kuhli</i>                                                                                                                                                                                            | Malaysia        | Serology          | 84     |
|                     | <i>Pteropus hypomelanus</i>                                                                                                                                                                                                                                                                                                         | Malaysia        | Culture           | 85     |
|                     | <i>Pteropus giganteus</i>                                                                                                                                                                                                                                                                                                           | Bangladesh      | Serology          | 89     |
|                     | <i>Pteropus lylei</i>                                                                                                                                                                                                                                                                                                               | Cambodia        | Serology, culture | 91, 92 |
|                     | <i>Hipposideros larvatus</i> , <i>Pteropus hypomelanus</i> , <i>P. lylei</i> , <i>P. vampyrus</i>                                                                                                                                                                                                                                   | Thailand        | Serology, RT-PCR  | 93     |
| Mapuera virus       | <i>Pteropus vampyrus</i>                                                                                                                                                                                                                                                                                                            | Indonesia       | Serology          | 94     |
| Parainfluenza virus | <i>Sturnira lilium</i>                                                                                                                                                                                                                                                                                                              | Brazil          | Culture           | 71     |
| Tioman virus        | <i>Rousettus leschenaulti</i>                                                                                                                                                                                                                                                                                                       | India           | Culture           | 69, 70 |
|                     | <i>Pteropus hypomelanus</i>                                                                                                                                                                                                                                                                                                         | Malaysia        | Culture           | 98     |

(Continues)

Supplementary Table (Continued)

| Family        | Genera/species                                      | Bat genera/species associated with the virus                                                                                                                                                                                                                                                                                                                       | Geographical locations                                                              | Method of detection <sup>a</sup> | References    |
|---------------|-----------------------------------------------------|--------------------------------------------------------------------------------------------------------------------------------------------------------------------------------------------------------------------------------------------------------------------------------------------------------------------------------------------------------------------|-------------------------------------------------------------------------------------|----------------------------------|---------------|
| Reoviridae    | Nelson Bay virus                                    | <i>Pteropus poliocephalus</i>                                                                                                                                                                                                                                                                                                                                      | Australia                                                                           | Culture                          | 100           |
| Retroviridae  | Pulau virus                                         | <i>Pteropus hypomelanus</i>                                                                                                                                                                                                                                                                                                                                        | Malaysia                                                                            | Culture                          | 101           |
|               | CpERV-β5_AC138156                                   | <i>Carollia perspicillata</i>                                                                                                                                                                                                                                                                                                                                      | Central and South America                                                           | PCR                              | 102           |
| Rhabdoviridae | Cocal virus                                         | <i>Phyllostomus hastatus</i>                                                                                                                                                                                                                                                                                                                                       | Trinidad                                                                            | Serology                         | 23            |
|               | Rabies virus (Lyssavirus genotype 1)                | <i>Artibeus</i> spp., <i>Desmodus rotundus</i> , <i>Eptesicus</i> spp., <i>Eumops auripendulus</i> , <i>Histiotus montanus</i> , <i>Lasionycteris noctirogans</i> , <i>Lasiurus</i> spp., <i>Molossus</i> spp., <i>Myotis</i> spp., <i>Nyctinomops laticaudatus</i> , <i>Pipistrellus subflavus</i> , <i>Pipistrellus herpessus</i> , <i>Tadarida brasiliensis</i> | Worldwide                                                                           | Microscopy, culture, RT-PCR      | 117–124       |
|               | Lagos bat virus (Lyssavirus genotype 2)             | <i>Pteropus poliocephalus</i>                                                                                                                                                                                                                                                                                                                                      | India                                                                               | Culture                          | 125           |
|               |                                                     | <i>Eidolon helvum</i> , <i>Epomops wahlbergi</i> , <i>Micropteropus pussilus</i> , <i>Nycteris cambiensis</i> , <i>Rousettus aegyptiacus</i>                                                                                                                                                                                                                       | Nigeria, South Africa, Central African Republic, Senegal, Zimbabwe, Ethiopia, Egypt | Culture                          | 109           |
|               | Duvenhage virus (Lyssavirus genotype 4)             | <i>Miniopterus schreibersii</i> , <i>Nycteris thebaica</i>                                                                                                                                                                                                                                                                                                         | South Africa                                                                        | Culture                          | 110, 111      |
|               | European bat lyssaviruses 1 (Lyssavirus genotype 5) | <i>Eptesicus serotinus</i> , <i>Vespertilio murinus</i>                                                                                                                                                                                                                                                                                                            | Europe                                                                              | Microscopy, culture, RT-PCR      | 128, 129, 131 |

|                                                                                                                                                                                                                                             |                                                                                                                                                                                            |                              |          |
|---------------------------------------------------------------------------------------------------------------------------------------------------------------------------------------------------------------------------------------------|--------------------------------------------------------------------------------------------------------------------------------------------------------------------------------------------|------------------------------|----------|
| <i>Eptesicus serotinus</i> ,<br><i>Myotis myotis</i> , <i>Myotis nattereri</i> , <i>Miniopterus schreibersii</i> , <i>Rhinolophus ferrumequinum</i> , <i>Tadarida teniotis</i> , <i>Vespertilio murinus</i><br><i>Rousettus aegyptiacus</i> | Spain                                                                                                                                                                                      | Microscopy, serology, RT-PCR | 130      |
|                                                                                                                                                                                                                                             | Zoo bat in Denmark imported from the Netherlands                                                                                                                                           | Microscopy, culture          | 129      |
| European bat lyssaviruses 2 (Lyssavirus genotype 6)                                                                                                                                                                                         | <i>Myotis daubentonii</i> , <i>M. dasycneme</i>                                                                                                                                            | Microscopy, serology, RT-PCR | 128, 130 |
|                                                                                                                                                                                                                                             | <i>Myotis daubentonii</i>                                                                                                                                                                  | Culture, serology, RT-PCR    | 133      |
|                                                                                                                                                                                                                                             | <i>Myotis daubentonii</i>                                                                                                                                                                  | Microscopy, culture, RT-PCR  | 134      |
| Australian bat lyssavirus (Lyssavirus genotype 7)                                                                                                                                                                                           | <i>Pteropus alecto</i> , <i>P. conspicillatus</i> , <i>P. poliocephalus</i> , <i>P. scapulatus</i> , <i>Saccolaimus flaviventris</i>                                                       | Culture                      | 135, 137 |
| Aravan virus                                                                                                                                                                                                                                | <i>Myotis blythii</i>                                                                                                                                                                      | Culture                      | 106      |
| Irkut virus                                                                                                                                                                                                                                 | <i>Murina leucogaster</i>                                                                                                                                                                  | Culture                      | 107      |
| Khujand virus                                                                                                                                                                                                                               | <i>Myotis mystacinus</i>                                                                                                                                                                   | Culture                      | 108      |
| West Caucasian bat virus                                                                                                                                                                                                                    | <i>Miniopterus schreibersii</i>                                                                                                                                                            | Culture                      | 107      |
| Lyssaviruses                                                                                                                                                                                                                                | <i>Mineopterus schreibersii</i> , <i>Philetor brachypteris</i> , <i>Pteropus hypomelanus</i> , <i>Rousettus amplexicaudatus</i> , <i>Scotophilus kuhlii</i> , <i>Taphozous melanopogon</i> | Serology                     | 140      |

(Continues)

Supplementary Table (Continued)

| Family      | Genera/species                    | Bat genera/species associated with the virus                                                                                                                                                                                                                                        | Geographical locations | Method of detection <sup>a</sup> | References                        |          |     |
|-------------|-----------------------------------|-------------------------------------------------------------------------------------------------------------------------------------------------------------------------------------------------------------------------------------------------------------------------------------|------------------------|----------------------------------|-----------------------------------|----------|-----|
| Togaviridae |                                   | <i>Cynopterus sphinx</i> , <i>Hipposideros larvatus</i> , <i>Pteropus lylei</i> , <i>Scotophilus kuhlii</i> , <i>Tadarida plicata</i> , <i>Taphozous theobaldi</i> , <i>Taphozous melanopogon</i> , <i>Hipposideros armiger</i> , <i>Pteropus lylei</i> , <i>Pteropus giganteus</i> | Cambodia               | Serology                         | 141                               |          |     |
|             | Mount Elgon bat virus             | <i>Rhinolophus hildebrandtii eloquens</i>                                                                                                                                                                                                                                           | Thailand               | Serology                         | 142                               |          |     |
|             | Chikungunya virus                 | <i>Scotophilus</i> spp.                                                                                                                                                                                                                                                             | Bangladesh             | Serology                         | 143                               |          |     |
|             | Eastern equine encephalitis virus | <i>Artibeus lituratus</i> , <i>Carollia perspicillata</i> , <i>Phyllostomus hastatus</i> , <i>Platyrrhinus (Vampyrops) helleri</i>                                                                                                                                                  | Kenya                  | Culture                          | Culture                           | 105      |     |
|             |                                   | <i>Artibeus intermedius</i> , <i>Artibeus jamaicensis</i> , <i>Artibeus lituratus</i> , <i>Glossophaga soricina</i> , <i>Rhynchonycteris naso</i> , <i>Sturnira lilium</i>                                                                                                          | Senegal                | Culture                          | Culture                           | 149      |     |
|             |                                   | <i>Molossus ater</i> , <i>Phyllostomus hastatus</i>                                                                                                                                                                                                                                 | Trinidad               | Serology                         | Serology                          | 23       |     |
|             |                                   | <i>Artibeus jamaicensis</i> , <i>Carollia brevicauda</i> , <i>Phyllostomus discolor</i> , <i>Sturnira lilium</i> , <i>Sturnira ludovici</i>                                                                                                                                         | Guatemala              | Serology                         | Serology                          | 150      |     |
|             |                                   | <i>Uroderma bilobatum</i>                                                                                                                                                                                                                                                           |                        |                                  |                                   |          |     |
|             |                                   | <i>Desmodus rotundus</i>                                                                                                                                                                                                                                                            | Guatemala              | Culture                          | Culture                           | 152      |     |
|             |                                   | <i>Carollia perspicillata</i>                                                                                                                                                                                                                                                       | Mexico                 | Culture                          | Culture                           | 153      |     |
|             |                                   | <i>Artibeus jamaicensis</i> , <i>Artibeus lituratus</i> , <i>Artibeus phaeotis</i> , <i>Desmodus rotundus</i> , <i>Glossophaga commissarisi</i> , <i>Myotis nigricans</i> , <i>Uroderma bilobatum</i>                                                                               | Brazil                 | Culture                          | Culture                           | 154      |     |
|             |                                   | <i>Artibeus lituratus</i>                                                                                                                                                                                                                                                           | Guatemala              | Serology, culture                | Serology, culture                 | 152      |     |
|             |                                   |                                                                                                                                                                                                                                                                                     |                        |                                  | ( <i>Uroderma bilobatum</i> only) |          |     |
|             |                                   | Western equine encephalitis virus                                                                                                                                                                                                                                                   |                        | Guatemala                        | Serology                          | Serology | 150 |

<sup>a</sup>Microscopy, includes light microscopy, electron microscopy, histopathology, immunohistopathology, and direct immunofluorescent staining of tissues. Culture, includes cell cultures and animal inoculation.
